# Supplementary material for: Characterization of Hemagglutinin Negative Botulinum Progenitor Toxins
Source: PubMed Central journal article supplement (PMC5488043; doi:10.3390/toxins9060193), 2017-06-15
Supplement: toxins-09-00193-s001.pdf [file toxins-09-00193-s001.pdf]

# Supplementary Materials: Characterization of Hemagglutinin Negative Botulinum Progenitor Toxins

Suzanne R. Kalb, Jakub Baudys, Theresa J. Smith, Leonard A. Smith, John R. Barr

**Table S1.** List of NCBI accession numbers for proteins identified.

| Strain/Complex of Origin          | Protein             | NCBI Accession Number |
|-----------------------------------|---------------------|-----------------------|
| BoNT A1 Hall                      | BoNT/A1 Hall        | WP_011948511.1        |
| BoNT A1 Hall                      | NTNH from BoNT/A    | CAA63550.1            |
| BoNT A1 Hall                      | HA-70 from BoNT/A   | WP_011948507          |
| BoNT A1 Hall                      | HA-33 from BoNT/A   | WP_011948508.1        |
| BoNT A1 Hall                      | HA-17 from BoNT/A   | WP_003356711.1        |
| BoNT E3                           | BoNT/E3             | WP_012451426.1        |
| BoNT E3                           | NTNH from BoNT/E3   | P46082.1              |
| BoNT E3                           | Orf-X1 from BoNT/E3 | ALT05363.1            |
| BoNT E3                           | Orf-X2 from BoNT/E3 | ALT05471.1            |
| BoNT E3                           | Orf-X3 from BoNT/E3 | ALT05470.1            |
| BoNT F1                           | BoNT/F1             | WP_011987710.1        |
| BoNT F1                           | NTNH from BoNT/F    | WP_011987709.1        |
| BoNT F1                           | P47 from BoNT/F     | WP_011987708.1        |
| BoNT F1                           | Orf-X2 from BoNT/F  | WP_012703709.1        |
| BoNT A1 OrfX+                     | BoNT/A1             | ABM73969.1            |
| BoNT A1 OrfX+                     | NTNH from BoNT/A1   | CAA61123.1            |
| BoNT A2                           | BoNT/A2             | WP_012703873.1        |
| BoNT A2                           | NTNH from BoNTA2    | CAA61233.1            |
| BoNT A3                           | BoNT/A3             | WP_012301031.1        |
| BoNT A3                           | NTNH from BoNT/A3   | WP_012300955.1        |
| BoNT A1(B)                        | BoNT/A1(B)          | WP_003356619.1        |
| BoNT A1(B)                        | NTNH from BoNT/B    | WP_003357111.1        |
| BoNT A1(B)                        | NTNH from BoNT/A    | WP_003355794.1        |
| BoNT A1(B)                        | HA-70 from BoNT/B   | WP_003356638.1        |
| BoNT A1(B)                        | HA-33 from BoNT/B   | WP_003356066.1        |
| BoNT A1(B)                        | HA-17 from BoNT/B   | WP_012291566.1        |
| BoNT A1(B)                        | Orf-X2 from BoNT/A  | WP_003356338.1        |
| BoNT A2b5 (extracted with anti-A) | BoNT/A2             | WP_040110135.1        |
| BoNT A2b5 (extracted with anti-A) | NTNH from BoNT/A2   | WP_040110134.1        |
| BoNT A2b5 (extracted with anti-A) | NTNH from BoNT/B    | WP_039698966.1        |
| BoNT A2b5 (extracted with anti-A) | Orf-X2 from BoNT/A  | WP_040110130.1        |
| BoNT A2b5 (extracted with anti-A) | Orf-X1 from BoNT/A  | WP_012704051.1        |
| BoNT A2b5 (extracted with anti-A) | Orf-X3 from BoNT/A  | WP_040110129.1        |
| BoNT A2b5 (extracted with anti-B) | BoNT/B5             | WP_040110073.1        |
| BoNT A2b5 (extracted with anti-B) | NTNH from BoNT/B    | WP_012431075.1        |
| BoNT A2b5 (extracted with anti-B) | Orf-X2 from BoNT/A  | WP_040110130.1        |
| BoNT A2b5 (extracted with anti-B) | HA-33 from BoNT/B   | WP_012291520.1        |
| BoNT A2b5 (extracted with anti-B) | Orf-X1 from BoNT/A  | WP_012704051.1        |
| BoNT A2f4 (extracted with anti-A) | BoNT/A2             | WP_012703873.1        |
| BoNT A2f4 (extracted with anti-A) | NTNH from BoNT/A2   | WP_025775292.1        |
| BoNT A2f4 (extracted with anti-A) | NTNH from BoNT/F    | WP_025775292.1        |
| BoNT A2f4 (extracted with anti-A) | Orf-X2 from BoNT/A  | WP_021107445.1        |

|                                   |                    |                |
|-----------------------------------|--------------------|----------------|
| BoNT A2f4 (extracted with anti-A) | Orf-X2 from BoNT/F | WP_021106991.1 |
| BoNT A2f4 (extracted with anti-A) | P47 from BoNT/A    | WP_012704373.1 |
| BoNT A2f4 (extracted with anti-A) | Orf-X3 from BoNT/A | WP_003357203.1 |
| BoNT A2f4 (extracted with anti-A) | Orf-X1 from BoNT/A | WP_012300974.1 |
| BoNT A2f4 (extracted with anti-F) | BoNT/F4            | WP_021106996.1 |
| BoNT A2f4 (extracted with anti-F) | NTNH from BoNT/A   | ADA79542.1     |
| BoNT A2f4 (extracted with anti-F) | NTNH from BoNT/F   | WP_025775292.1 |
| BoNT A2f4 (extracted with anti-F) | Orf-X2 from BoNT/A | WP_012301067.1 |
| BoNT A2f4 (extracted with anti-F) | Orf-X2 from BoNT/F | WP_021106991.1 |
| BoNT A2f4 (extracted with anti-F) | P47 from BoNT/A    | WP_012704373.1 |
| BoNT A2f4 (extracted with anti-F) | Orf-X3 from BoNT/A | WP_012705769.1 |
| BoNT A2f4 (extracted with anti-F) | Orf-X3 from BoNT/F | WP_076174538.1 |
| BoNT A2f4 (extracted with anti-F) | Orf-X1 from BoNT/A | WP_040110131.1 |

---
